# Supplementary material
Source: PubMed Central journal article supplement (PMC5061117)
Supplement: NIHMS756154-supplement-data.pdf [file NIHMS756154-supplement-data.pdf]

## Preliminary

---

You have been identified for this resource inventory due to your leadership role in emergency medicine research.

This CTSA Emergency Care/Medicine Research Thematic Special Interest Group, (CTSA ECR/M TSIG) is a grassroots group of interested emergency care/medicine researchers at institutions with/or affiliated with institutions with CTSA's (Clinical and Translational Science Awards) from the National Institutes of Health.

The goal of this instrument is to create an inventory of resources that are available for emergency care research across the CTSA consortium, to conduct a needs assessment to highlight gaps that might require attention, and to propose strategies for collaboration within emergency medicine and across other academic disciplines

*The Stanford University IRB has reviewed this resource inventory and determined it to be exempt. Your participation is voluntary. You will receive reminders until you complete the resource inventory, delegate it to another person or opt out.*

---

- Yes, I will participate in the resource inventory
- No, I decline participation
- No, I am not the right person - please send this resource inventory to someone else (fill their email address into text box below)

## Respondent Background

---

Would you be interested in being included in a national emergency care CTSA network?

---

- Yes
- Maybe
- No

What is your role and title in the Emergency Dept.? Please do not include your name.

---

Which CTSA are you affiliated with?

---

Do you have a role or designated title at the CTSA

Yes, please specify role

No

Do any other faculty from your department have a role or designated title at the CTSA

Yes, please specify role(s)

No

How long (in months) have you had an affiliation with your CTSA

---

What type of research does your department conduct: (check all that apply)

- 
- Basic - (Includes animal, molecular, genetic and other pre-clinical research focused on mechanisms of disease and function - excludes research conducted directly on living human subjects)
  - Clinical -(Research conducted with human subjects including clinical trials, epidemiological and behavioral studies, outcomes and health services research.) Source: [NIH PHS 398 Instructions on Human Subjects Research](#)
  - Translational - (Includes steps necessary to develop new therapeutics, devices and diagnostics from basic discoveries, the steps necessary to establish real world efficacy, and the research needed to improve the practical implementation and dissemination of improved approaches to care. Source: [RFA-RM-07-007 CTSA RFA](#))

Community Based - (defined as scientific inquiry conducted in communities in partnership with researchers, and is characterized by substantial community input in the development of the proposed study.) Source:[NCATS website](#)

Other (Please specify)

Is there more than one ED affiliated with your CTSA

---

- Yes, and our faculty group manages all of them
- Yes, and our faculty group manages only one (or some subset) of them
- No

### CTSA resources available

---

What resources or capabilities has your department utilized from your affiliated CTSA(s)? (check all that apply)

---

- databases
- informatics
- methodology or biostats support
- grant writing
- research coordinator
- education/training
- nursing
- lab services
- Other

What resources are NOT available from your CTSA that are of high priority for your departmental research

---

Have you or other members of your department ever submitted an application for research funding through your CTSA? If so, which (check all that apply)

---

have not submitted

pilot project

supplement

education/training

Other

Have you or any representatives from your department met with your CTSA PI regarding emergency care research?

---

Yes

No

Have you or other faculty in your department ever received research funding through your CTSA? If so, which (check all that apply)

---

pilot project

supplement

education/training

Other

### **Emergency Department Resources**

---

Does your Emergency Dept./ Division have the ability to screen and recruit patients in real time for clinical research?

---

Yes, 24/7

Yes, but not 24/7

No

Does your Emergency Dept./Division utilize in person research coordinators or associates to facilitate research enrollment or data collection.

---

Yes, 24/7

Yes, but not 24/7

No

Does your Emergency Dept/Division have electronic medical records available for secondary use in clinical research (i.e. data warehouse)?

---

Yes

No

In collecting a set of data from your EMR, how long would it take to extract the elements, de-identify them and upload it to a central data repository for emergency medicine research (cross institutional)? Assume the study is already IRB approved.

---

< 1 day

1day

1-4weeks

2-3 months

4-6 months

> 6months

Across all emergency medicine sites under your affiliation, approximately how many annual patient visits occur. Please enter a number without commas (example: if your faculty group oversees two clinical sites and each sees 50,000 adult

patients and 1,000 pediatric patients enter 100000 next to adult and 2000 next to pediatric).

---

Adult

Pediatric

Is your emergency department part of any of these NIH funded research networks (check all that apply)

---

- Neurological Emergencies Treatment Trials (NETT) Network
- Resuscitation Outcomes Consortium (ROC)
- Pediatric Emergency Care Applied Research Network
- Other

Would you be willing to participate in a project to demonstrate the ability of a potential network to collect a limited data set from your EMR? Answering yes will open up questions regarding contact information that will not be shared with any commercial entities and will be made available as part of the resource database. (This information will not be published, but will be provided to interested researchers working on developing emergency care research projects involving multiple CTSA sites.)

---

- Yes
- No

### Contact Information

---

Is the email address we sent this resource inventory to the best one for us to use?

---

- Yes
- No, please use this one instead:

Please provide additional contact information. If you provide contact information we will provide you with a link to the resource inventory database when this has been assembled. We hope this will be useful to emergency medicine researchers planning research studies that can capitalize on the infrastructure of several CTSA's.

---

Faculty contact Name (Research Director or Chair)

Email for faculty contact

Institution Name

Address

Address 2

City

State

Zip Code

Telephone

Name of office contact (if administrative assistant is best person to contact you through)

Email for office contact
